# Supplementary material
Source: Springer Nature journal article supplement (https://www.springermedizin.de/resource/supplementary/12885_2013_4041_MOESM1_ESM.pdf/9464998)
Supplement: MOESM1 [file 9464998]

**Additional File 1.** Primer sequences used in qPCR

| <b>Gene Name</b> | <b>Forward Primer Sequence</b>   | <b>Reverse Primer Sequence</b> |
|------------------|----------------------------------|--------------------------------|
| BAP1             | GGTGGATGATACGTCCGTGAT            | GCTCAGCAAGGCATGAGTTG           |
| CKMT1A           | CTCGAGACTGGCCAGATGCT             | TCCATGGAGATCACCCGTGTA          |
| DCT              | TCAGTTTCAGGAATGCTTTGGAA          | TCCCGTTCAGGAAGGAATGA           |
| EXTL2            | TCATCAGCACCCACAGACCTT            | GATGAAGTAGAGACGTGCTTTCTAGGA    |
| FAM175B          | TGACTCACAAATCAGCAACACAGA         | CATTCACTTTGCTTGCGTAGTCAT       |
| HECTD2           | TTCACCTGCACATCTTGTTTTCC          | TGCATCCATAGATGTACGCTGTTT       |
| MBNL1            | ATCCGGGTGTCCTGTACCT              | GCAATTGCCACGTTGGTACTC          |
| MITF             | GAACTCAAAGTCAACCGCTGAA           | GCGTGATGTCATACTGGAGGAG         |
| NANOG            | TGCTTATTCAGGACAGCCCT             | TCTGGTCTTCTGTTTCTTGACT         |
| OCT4             | GATAACTGGTGTGTTTATGTTCTTACAAGTCT | GCTTCAGGAGCTTGGCAAATT          |
| PRPF4            | GCAGGGATCGAAGCTGGAA              | TCTCTCAAACCTCAGCCAATACTTCTG    |
| TNPO1            | TATTGGTGA CTCTCTCTCTGATTAG       | TGGTAAGAGGTCAGGCCAATTC         |
| TRPM1            | ATGAGTTTCGGAGTAGCCCGTCAA         | ATCTGGTCTGCAAACACCTCTCCA       |
| TYR              | ATTTGCCTGAGTTTGACCCAA            | CAGTAAGTGGACTAGCAAATCCTTCC     |
| UBC              | ATTTGGGTCGCGGTTCTTG              | TGCCTTGACATTCTCGATGGT          |
| UBE2K            | GCTCGACTTTGGGCACATGT             | TGCATTCTATCAAAGCCCATAG         |
